# Supplementary material for: Neuromyelitis optica study model based on chronic infusion of autoantibodies in rat cerebrospinal fluid
Source: PubMed Central journal article supplement (PMC4872335; doi:10.1186/s12974-016-0577-8), 2016-05-18

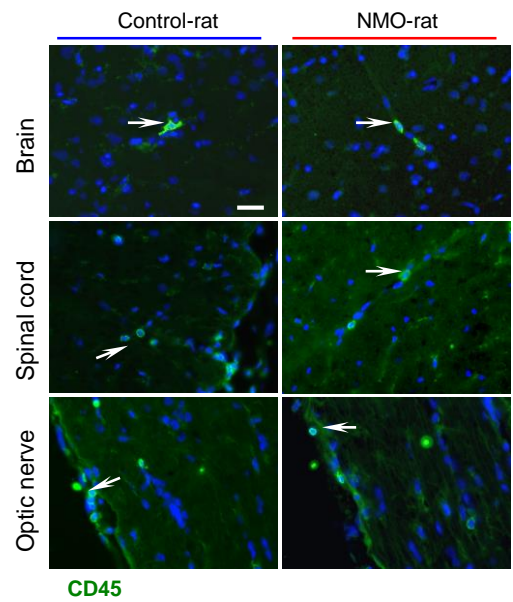

Supplement: 12974_2016_577_MOESM3_ESM.pdf [file 12974_2016_577_MOESM3_ESM.pdf]
